23 **Abstract**

24 Adoption of microorganisms as platforms for sustainable biobased production requires host cells  
25 to be able to withstand harsh industrial conditions, which are usually far from the ones where  
26 these organisms are naturally adapted to thrive. However, novel survival mechanisms unearthed  
27 by the study of microbiomes from extreme habitats may be exploited to enhance microbial  
28 robustness under the strict conditions needed for different applications. In this work, synthetic  
29 biology approaches were used to engineer enhanced acidic tolerance in *Escherichia coli* under  
30 extreme conditions through the characterization of a library of twenty-seven unique operons  
31 composed of combinatorial assemblies of three novel genes from an extreme environment and  
32 three synthetic ribosome binding sites. The results here presented illustrate the efficacy of  
33 combining different metagenomic genes for tolerance in truly synthetic genetic operons, as  
34 expression of these gene clusters increased hundred-fold the survival percentage of cells exposed  
35 to an acidic shock in minimal media at pH 1.9 under aerobic conditions.

36

37 **Introduction**

38 Biotechnology plays a central role in the expanding search for sustainable solutions to  
39 mitigate industries' dependency on non-renewable substrates, and the production of  
40 diverse chemicals by microorganisms has been of great importance in providing  
41 alternatives to already established petroleum-based processes. Microorganisms can be  
42 exploited as microbial cell factories due to their natural features, or metabolically  
43 engineered to produce both chemical building blocks and high added value products from  
44 renewable feedstocks such as carbohydrates, glycerol and single carbon compounds <sup>1</sup>.  
45 However, despite the richness of microbes that inhabit the most diverse habitats all over  
46 the planet, only a fraction of them can be properly cultivated in laboratory<sup>2</sup>, and the  
47 establishment of new industrial microbial processes has been limited to even fewer  
48 organisms which possess desirable fermentative characteristics <sup>3,4</sup>. A major challenge for

49 these endeavors is that microorganisms often lack both the metabolic flexibility and  
50 robustness to endure the usually strict and temporally dynamic conditions in parameters  
51 such as temperature, pH and even product concentrations that are associated with  
52 sustainable and cost-effective industrial fermentations, hindering the replacement of  
53 petroleum-based processes by microbial production<sup>5,6</sup>.

54

55 Even if not all microorganisms may be cultivated by classical microbiological  
56 approaches, technologies that have enabled their genetic material to be accessed and  
57 explored have grown exponentially in recent years and have granted researchers novel  
58 tools for the study and exploitation of these genomes to diverse ends<sup>7</sup>. Metagenomic  
59 studies have been of great importance to uncover proteins with superior industrial  
60 properties<sup>8</sup>, rare bioactive compounds<sup>9</sup>, and even novel genetic parts for the construction  
61 of reliable synthetic circuits in non-conventional bacterial hosts<sup>10</sup>; moreover, studies from  
62 the metagenome of contaminated sites have revealed novel pathways for the degradation  
63 of heavy metals<sup>11</sup>, toxic chemicals<sup>12</sup>, as well as innovative mechanisms that enable  
64 microorganisms to thrive in the most hostile environments<sup>13</sup>, which can be tapped to grant  
65 industrially relevant microorganisms the ability to perform under the harsh conditions  
66 needed for efficient fermentation conditions.

67

68 The use of one key protein or larger natural protein complexes derived from extremophile  
69 microorganisms has already been used to develop promising strains showing improved  
70 tolerance levels to different insults, such as temperature, solvent concentration, acidity  
71 and oxidative stress<sup>14-16</sup>, and show the feasibility of exploiting these natural mechanisms  
72 to engineer robustness in microbial hosts. In this work, we investigate the effectiveness  
73 of expressing synthetic assemblies of different acid resistance determinants by tailoring

74 a set of 27 small operons (comprising less than 1.4kb in size each) that consisted of three  
75 novel proteins previously uncovered from an extremely acidic environment<sup>17</sup> regulated  
76 by different Ribosome Binding Sites (RBS). The operons were investigated regarding  
77 their potential to enhance *Escherichia coli* survival under a pH 1.9 acidic shock, as well  
78 as the fitness cost that their expression exerted over the cells. Our results show that,  
79 although individually the genes displayed modest capacity to confer acid resistance, the  
80 survival percentage of cells was sharply enhanced by their simultaneous expression, and  
81 that a wide range of survival phenotypes was achieved by simple permutations of key  
82 genetic elements. Yet, the results showed a non-linear relation between protein translation  
83 and observed resistance levels, as increasing RBS strength not always resulted in  
84 increased acid tolerance. Altogether, the approach presented here allowed the  
85 identification of strains with diverse growth profiles that were over 100-fold more tolerant  
86 to the acidic stress than the original parental one, demonstrating the potential of  
87 metagenomics and synthetic biology to expand the cell capabilities.

88

## 89 **Results and discussion**

### 90 Operon library assembly

91 Using functional metagenomic libraries, we previously identified a collection of different  
92 genes from acidic river samples that enabled *E. coli* and other bacteria to withstand an  
93 extremely acidic challenge<sup>17</sup>. From this set, three genes were chosen to compose the  
94 synthetic operons engineered in this study. Namely, these genes were annotated as  
95 bearing similarities to the DNA-binding protein HU, a major component of nucleoid in  
96 bacteria<sup>18</sup>, to a RNA-binding protein (RBP), as well as to the ATP-dependent  
97 serinoprotease ClpP, a member of the chaperone-protease complexes that assist misfolded

98 protein degradation as a mechanism of stress response in diverse organisms<sup>17,19</sup>. In order  
99 to assess whether these novel metagenomic genes could work together to further improve  
100 bacterial tolerance to acidic stress, a combinatorial approach was employed for the  
101 engineering of synthetic operons (Acid Resistance Circuits, ARCs) composed by the three  
102 different resistance genes and three synthetic RBS over a pSEVA232 backbone<sup>20</sup> (**Figure**  
103 **1; Table 1**).

104

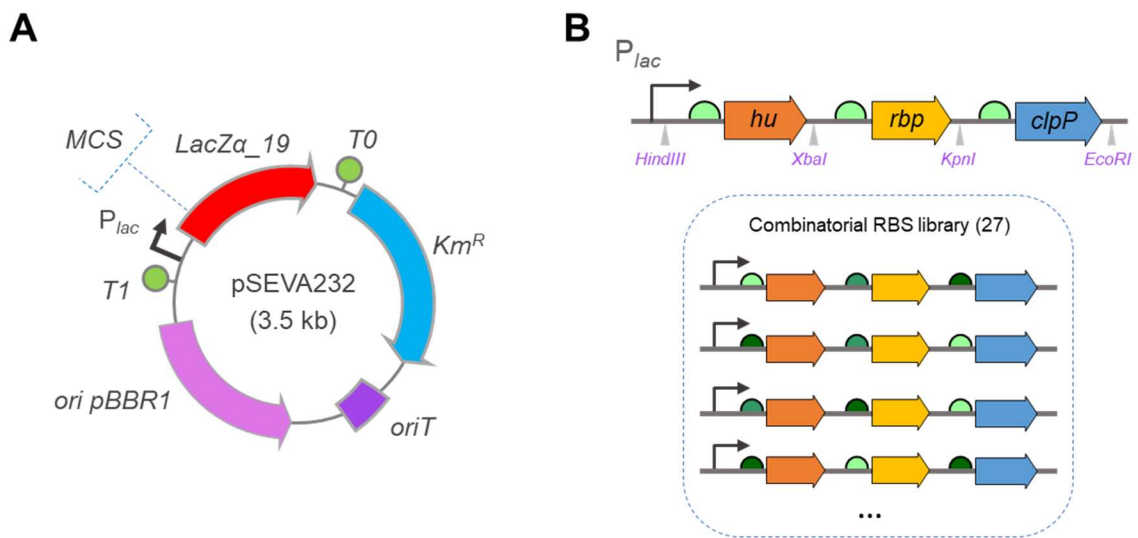

105

106

107

108

109

110

111

112

113

114

115

116

117

118

119

120

121

122

123

**Figure 1.** Schematic representation of the strategy employed to build the acid resistance circuits, ARCs. **A)** Circuits were cloned in the multiple cloning site (MCS) of vector pSEVA232<sup>20</sup>. Functional elements of the plasmid backbone are shown: Km<sup>R</sup>, antibiotic resistance marker; *oriT*, origin of transfer; *ori pBBR1*, broad host-range origin of replication; *T1* and *T0*, transcriptional terminators. **B)** Representation of synthetic circuits' architecture, showing each element in its respective predicted position. In this and every subsequent figure, the curved arrows depict the *P<sub>lac</sub>* promoter present in the pSEVA232 vector, the colored thick arrows represent the different stress resistance genes, and the semicircles represent the RBS. A scale of green was assigned to the RBS, and color intensity varies to represent their reported strengths of translation: light green is RBS1 (Bba\_B0031), medium green is RBS2 (Bba\_B0030) and dark green is RBS3 (Bba\_B0034). According to this key, the circuits shown in Figure 1B are pARC111 (top), pARC123, pARC321, pARC231 and pARC313 (bottom). Restriction sites used for cloning are shown in pink.

124 In these genetic circuits, the relative gene positions were fixed, *hu* being the first gene in  
125 the polycistronic mRNA, followed by *rbp* and then *clpP*, and an RBS slot was available  
126 upstream to each of them, allowing for the customization of the operon with any of three  
127 selected RBSs as a way to fine-tune translation levels between the different proteins  
128 (**Figure 1**). Accordingly, a calibration of the different RBSs using GFP<sub>Iva</sub>, a fluorescent  
129 protein possessing a C-terminal degradation tag<sup>21</sup>, as a proxy for gene expression was  
130 performed to determine their suitability to our system and revealed that the RBSs were  
131 both functional and, under these circumstances, allowed the distinction of low, medium  
132 and high relative expression profiles (**Figure S1**). Ultimately, this combinatorial approach  
133 resulted in 27 unique operon designs which were referred to as pARCXYZ, being “X”,  
134 “Y” and “Z” indicators of which RBS was present in each slot of the polycistronic mRNA  
135 in a given construction. **Figure 1B** provides an illustration for the general design of the  
136 synthetic circuits, while **Table 1** presents an overview of all the biological parts used in  
137 this work.

138

139 *Expression of synthetic operons greatly enhanced survival of bacteria under acidic*  
140 *challenge*

141 The extent to which the expression of *hu*, *clpP* and *rbp* genes was able to confer acid  
142 tolerance to *E. coli* was assessed under strict nutritional and physiological conditions  
143 in order to diminish native tolerance responses known to play important roles in *E. coli*  
144 stationary-phase survival<sup>22</sup>. For this, each gene was separately expressed under the  
145 control of a strong RBS sequence, and exponentially growing cells possessing these  
146 constructions were subjected to a 1.9 pH acidic challenge in minimal media (**Methods**).  
147 In our assays, we observed that the individual expression of genes granted acid tolerance  
148 to the cells in differing degrees, with cells expressing *hu* displaying a superior

149 performance over the ones expressing either of the other genes over, with 0.9% of survival  
150 after 1h of acidic challenge. This level was more than 10 times the 0.06% survival of *E.*  
151 *coli* cells harboring only an empty plasmid without tolerance genes. Yet, the survival rate  
152 for this clone showed a sharp decay after 2 hours of incubation, as it fell to 0.1% under  
153 these conditions (**Figure 2; Table S1**). Interestingly, when the three genes were co-  
154 expressed into an operon under the control of a weaker RBS upstream of each gene (e.g.  
155 pARC111), we were able to obtain 9.3% of survival percentages after one hour of acidic  
156 shock, resulting into a 10-fold improvement over the expression of *hu* by itself.  
157 Additionally, a much smoother decay rate in survival percentages was observed after two  
158 hours of acid exposure, as survival fell to 4.10% (**Figure 2; Table S1**). Such an  
159 improvement suggests that the relationship between gene expression and acid tolerance  
160 may not only be related to the absolute amount of protein translated, but that a synergic  
161 component played an important role in improving bacteria survival under prolonged  
162 periods of stress.

163

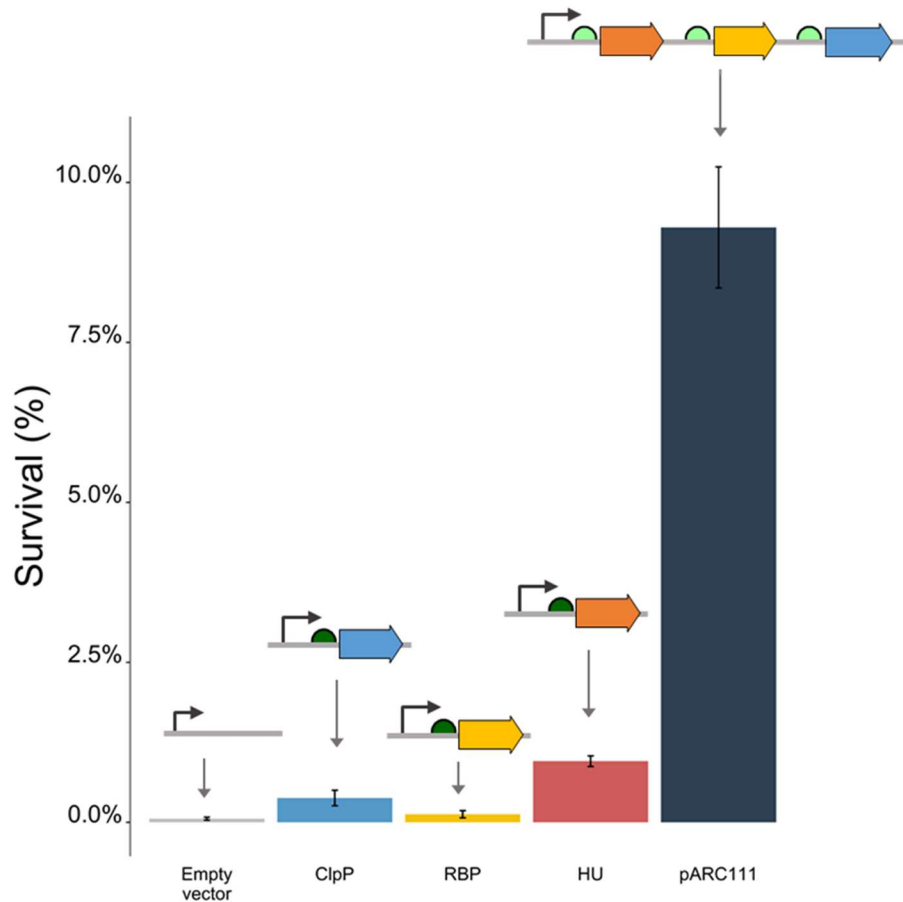

164

165

166

167

168

169

170

171

172

173

**Figure 2.** Acid resistance of the clones harboring plasmids with the individual resistance genes *clpP*, *rbp* and *hu* under the control of RBS3 and with pARC111, the operon which contains the weakest combination of RBS, showcasing the advantage of concurrent expression of such genes. Schematic representations of the synthetic circuits are shown above their respective bars. The survival is calculated as the percentage of colony forming unities after 1 h exposure to pH 1.9. Error bars indicate standard deviation from three independent experiments.

174

175

176

177

178

179

180

Next, we investigated how further combination of the genetic parts impacted the observed survival levels. As seen in **Figure 3**, if pARC111 is to be considered a ‘basal activity’ operon, the change of relative protein levels due to the replacement of the RBS in each position led to different and unexpected survival profiles. For instance, the exchange of RBS1 to RBS2 in the position of *clpP* in pARC112 caused no absolute difference in bacterial survival when compared to pARC111, while the presence of RBS3 in the same



181 position more than doubled the observed survival rates (as seen in pARC113). This  
182 relationship is not always true, however, since the RBS1 to RBS2 replacement in the *hu*  
183 position had a more significant impact than RBS1 to RBS3, as the pARC211 expressing  
184 strain showed almost 50% of survival after one hour of incubation whereas pARC311  
185 cells survival remains at a 30% level. Given that *hu* was also the individual gene  
186 associated to the greater levels of survival, these results may reinforce that genes play  
187 different roles in enhancing cells' resilience under stress, but they also hint to the context-  
188 dependent nature of RBS activity, as the tridimensional architecture derived from the  
189 combination of the RBS sequence itself and its surrounding regions (genetic context) has  
190 been shown to influence the recruitment and movement of ribosomes through the  
191 mRNA<sup>23</sup>. Furthermore, considering that our constructs are all expressed as a polycistronic  
192 mRNA strand, it must also be considered that the translation rates of the genes are not  
193 entirely independent, and relative RBS strength may vary as a result of the translational  
194 coupling between the adjacent genes<sup>25</sup>, a phenomenon that adds another whole layer of  
195 complexity to the 27 combinations that were made.

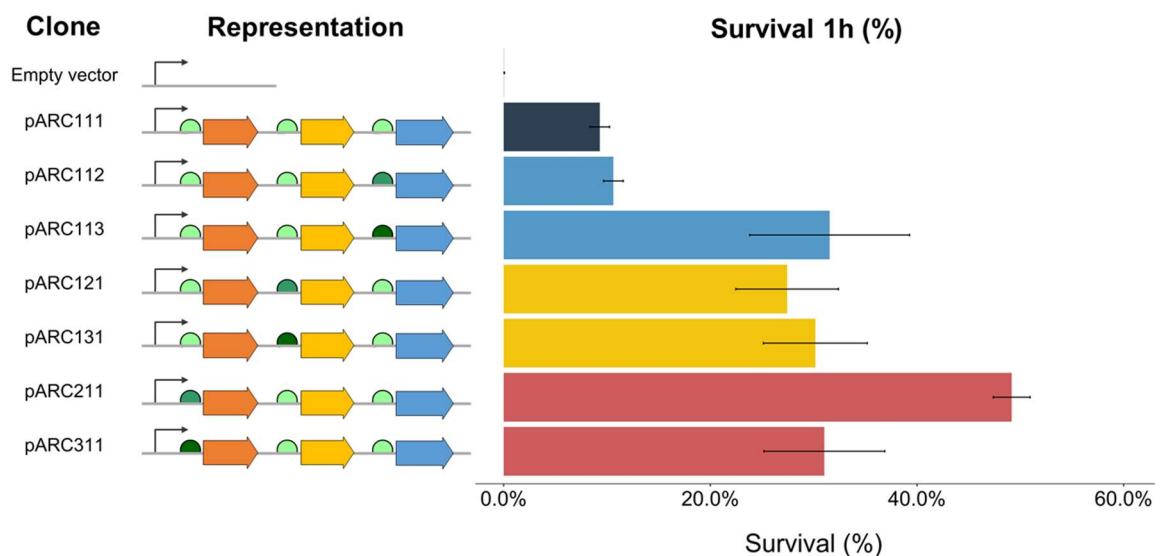

196

197

198 **Figure 3.** Differences in acid resistance promoted by variation of a single  
199 RBS in the synthetic circuits. Dark blue bar shows the survival percentage of  
200 pARC111, a “neutral” circuit, after 1h under acidic challenge; light blue bars,  
201 yellow bars and red bars, respectively, depict survival percentages of clones  
202 in which the RBS of *clpP*, *rbp* and *hu* were altered. Error bars indicate  
203 standard deviation from three independent experiments.  
204

205 *Survival percentages and expression costs for host cells varied due to operon design*

206 A wide range of survival profiles was obtained through the expression of our group of  
207 synthetic operons, as shown in **Figure 4**. Interestingly, cells bearing constructions one  
208 could argue as possessing the strongest set of tolerance determinants (i.e. strong RBS in  
209 every gene, such as pARC333, pARC323, etc.) showed lower survival percentages than  
210 those carrying more evenly composed operons, which we hypothesize to be a  
211 consequence of a heavier expression burden imposed over these cells than over those  
212 expressing less-demanding constructions<sup>26</sup>. Additionally, analysis of cellular growth  
213 profiles showed that the growth of strains bearing any of the plasmids containing pARCs  
214 was impaired when compared to the growth of a control carrying an empty plasmid, even  
215 at lower pH, despite the expression of pARCs evidently enabling great improvement in  
216 survival under acidic stress (**Figure S2; Table S2**).

217

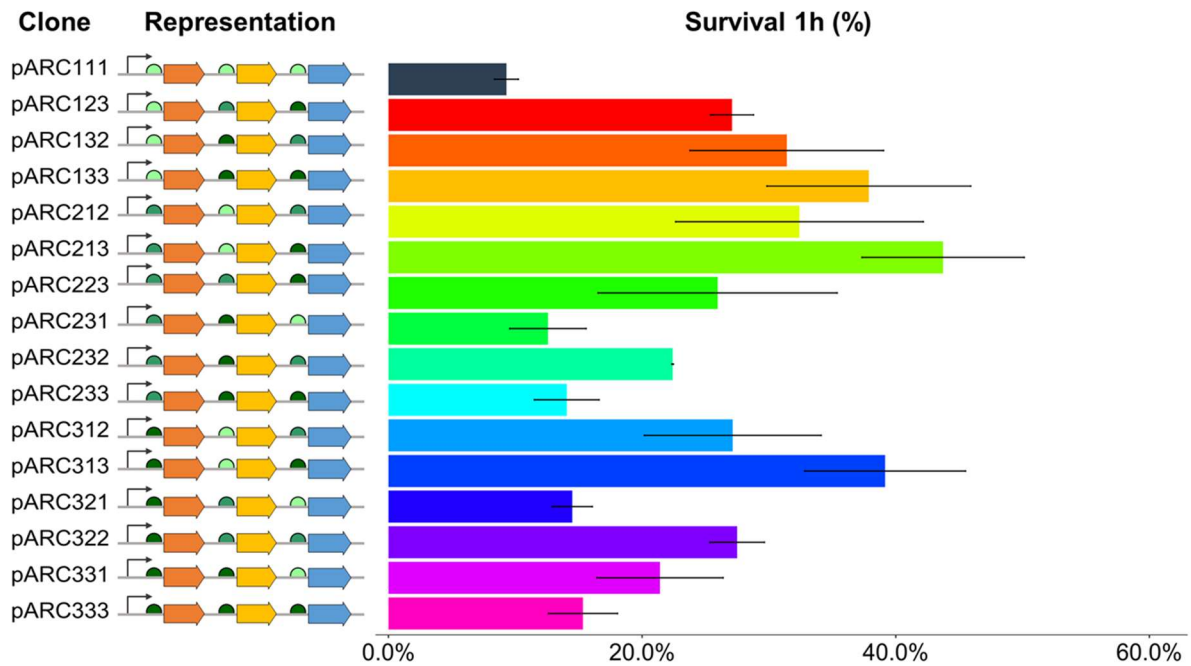

218

219

220

221

222

223

224

**Figure 4.** The combination of resistance genes under translational control of different synthetic RBS allowed that wide range of acid resistance levels could be obtained, as shown by the survival percentages calculated after the acidic challenge of clones harboring pARCs. Error bars indicate standard deviation from three independent experiments.

225

226

227

228

229

230

231

232

233

234

235

Aside from the quantitative burden of expressing any number of exogenous proteins, this behavior might suggest that the mechanism through which pARCs promote stress tolerance may involve a trade-off with cells' multiplication capacity, which may be consistent to putative stationary-phase roles that the expressed proteins may play. For instance, HU is described as a DNA-binding protein that shows affinity towards aberrant DNA formations rather than specific sequences<sup>27</sup>, and has been proposed to have protective effects against DNA damage in radioresistant bacterial species by tightly binding the genetical material together and avoiding the dispersion of fragments after irradiation, allowing efficient repair by the cells<sup>28</sup>. However *E. coli*'s native HU has also been associated with a number of important changes in the transcriptional profile of cells under different stresses and has been shown to positively influence translation of the

236 stationary-phase sigma factor RpoS<sup>18,29</sup>, it is unclear, however, if the expression of this  
237 novel HU provides *E. coli* cells with the same capacities as the native one, since *E. coli*  
238 and other enterobacteria possess unique heterodimeric HU, as the transcription factor IHF  
239 is, whereas HU homologs of other bacteria are usually homodimeric<sup>27</sup>. Given the cost of  
240 expressing the heterologous proteins and the interference they may cause in native  
241 cellular metabolism, we hypothesize that the prolonged cultivation periods needed to  
242 harvest cells prior to the acidic shock assay could have had a selective role in cultures  
243 expressing metabolically-demanding operons, and this might have sacrificed the tolerant  
244 phenotype by biasing the community towards faster growing cells<sup>30,31</sup>, resulting in  
245 underperforming populations, which might explain the observed results in clones bearing  
246 constructions such as pARC231, pARC233 and pARC333.

247

248 Although this apparent trade-off between resistance and growth was observed, it is  
249 remarkable that the comparative analysis of relative fitness between cells harboring  
250 pARCs reveals a rich, non-linear relationship between acid tolerance of cells and growth  
251 performance, as measured by the decrease in growth rate promoted by the expression of  
252 the synthetic operons. This two-dimensional analysis allowed us to explore an expression  
253 space and distinguish, between circuits that conferred similar levels of acidic resistance  
254 under stress, and those that have achieved this feat with the lowest detrimental effects to  
255 the host cells. In this sense, **Figure 5** and **Figure S3** show the relationship between the  
256 fitness cost and survival for some of the strains engineered in this work at different time  
257 points. For instance, the comparison of pARC111, pARC112 and pARC211 profiles show  
258 that, despite showing no difference in survival percentage after the acid resistance assay,  
259 the expression of pARC112 was much more costly to the host's metabolism than  
260 pARC111, and the expression of pARC211 provided much more tolerance than

261 pARC112 without a corresponding increase in fitness cost to the cells. Moreover, these  
262 results imply that greater levels of survival might be related to the expression of low-cost,  
263 efficient operons, as cells expressing pARC211, pARC212 and pARC213 operons,  
264 despite displaying an astounding increase in survival in the acid shock assays, showed  
265 relatively modest fitness cost. Taken together, this analysis shows how synthetic operons  
266 can be exploited to identify optimal solutions to improve bacterial resistance to stress  
267 without compromising cellular fitness.  
268

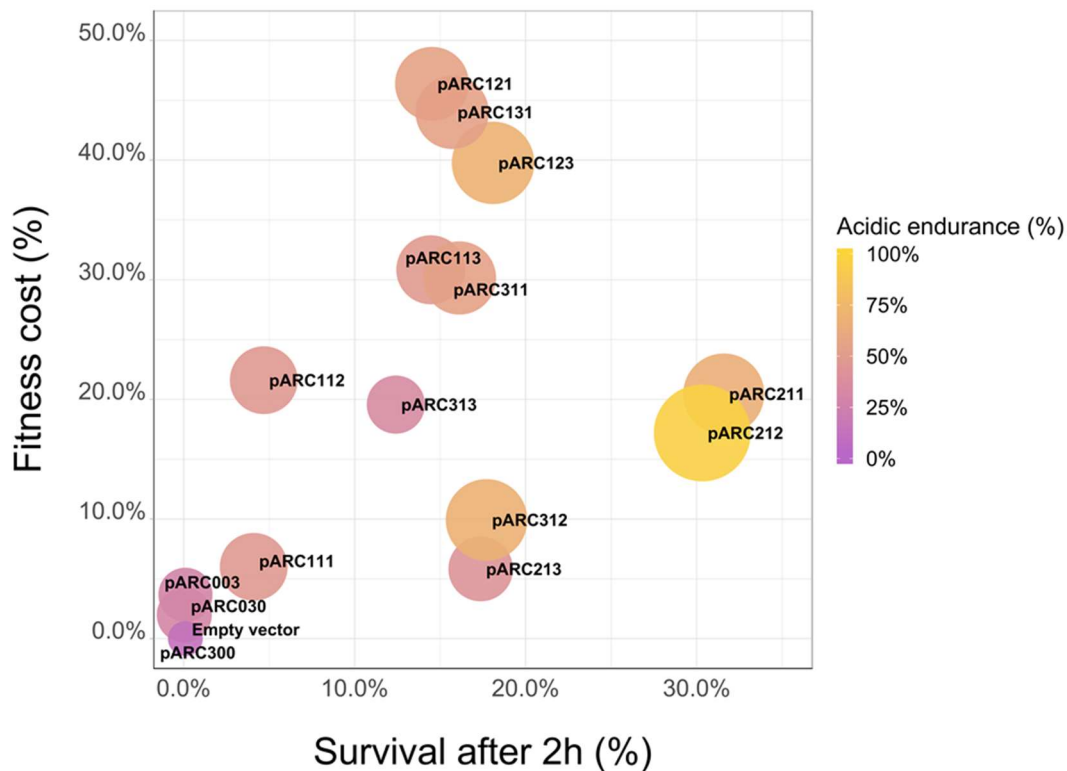

269

270 **Figure 5.** Analysis of the relationship between acid resistance after 2h of  
271 acidic challenge and fitness cost of different clones harboring plasmids with  
272 pARCs, showing that similar acid resistance levels can be obtained with  
273 varied associated expression costs for host cells.  
274

275

276

277 **Conclusion**

278 Several studies have employed combinatorial libraries of regulatory elements for  
279 optimizing the heterologous expression of biosynthetic pathways<sup>32-34</sup>, and different  
280 molecular strategies have been used for the rational improvement of bacterial robustness  
281 under different conditions, such as temperature, pH and ethanol concentration<sup>35-38</sup>.  
282 However, to the best of our knowledge, this is the first time such a combinatorial approach  
283 was taken to generate a library of truly synthetic tolerance clusters composed by  
284 seemingly unrelated resistance genes. This strategy allowed us to navigate through an  
285 expression space of strains with different resistance levels and growth profiles and  
286 identify cells with maximized acidic resistance despite low fitness cost. It is worth noting  
287 that, as a proof of concept, we only investigated operon design properties at translation  
288 levels, but the results here presented still may be further expanded by engineering systems  
289 also regulated at transcription level. Feedback-controlled promoters that adjust expression  
290 levels to match the insult sensed by the cells, for instance, were proven to be extremely  
291 effective in providing cells with enhanced fermentative properties due to lower associated  
292 expression burden<sup>39,40</sup>. As Synthetic Biology consolidates its position as a discipline that  
293 aims to engineer and expand the limits of life, the appropriation of unique mechanisms  
294 uncovered from the known bounds where life is found is of great importance to accelerate  
295 the development of new, robust synthetic circuits for addressing industrial and societal  
296 needs. Approaches such as the one presented in this study might be of great importance  
297 to uncover novel functions and non-obvious synergistic relationships between promising  
298 proteins, and hopefully researchers will be encouraged to delve more into the ever-  
299 growing richness of metagenomes available in genetic databases.

300 **Methods**

301 *Bacterial strains and culture conditions*

302 *E. coli* strain DH10B was used as a host in molecular cloning and acid challenge steps.  
303 All cultivations were performed under aerobic conditions in either LB or M9 minimal  
304 media<sup>41</sup> supplemented with 0.1 mM casamino acids and 1% (v/v) glycerol as carbon  
305 source (M9-gly), at 37°C and 220 rpm. When needed, media acidity was adjusted to the  
306 desired pH with 1M HCl and filtered with 0.2µM sterile filters. Selection of pSEVA232  
307 vector was performed by the addition of 50 µg/mL of kanamycin in the culture. IPTG was  
308 not added to the media, unless otherwise stated, as we noticed that expression levels above  
309 *P<sub>lac</sub>* basal rate impaired cell growth for pARC-expressing strains and were not needed for  
310 discernible levels of acidic tolerance.

311

### 312 *Operon construction and cloning*

313 The broad-host range, medium copy number plasmid pSEVA232 was used as the  
314 backbone for the assembly and expression of synthetic operons<sup>20</sup>. The previously  
315 described<sup>17</sup> genes were wholly synthesized by Integrated DNA Technologies (IDT) from  
316 the deposited GenBank sequences (accession numbers JX219763, JX219770, JX219767,  
317 for *rbp*, *clpP* and *hu*, respectively). The RBS sequences were retrieved from the iGEM  
318 Community Collection (<http://parts.igem.org/>) and incorporated on 5' primers for each  
319 gene, allowing the amplification of each of them with the desired RBS sequence. Primers  
320 were also designed with terminal restriction sites to direct fragment ligation. **Table S3**  
321 contains primer sequences used in this study. For the simultaneous ligation of the genes  
322 in the linearized vector, an equimolar pool of the fragments was treated as a single insert  
323 in ligation reactions and these were carried overnight at 16°C. Ligation mixtures were  
324 transformed in electrocompetent *E. coli* DH10B, which were incubated overnight for the  
325 growth of recombinant colonies.

326

327 *Acid shock assay*

328 Stress tolerance promoted by the expression of tolerance genes and synthetic operons was  
329 pursued for exponential-phase cells grown aerobically in nutrient poor media, as *E. coli*'s  
330 native resistance mechanisms to extreme acidity aren't wired to respond well under these  
331 conditions<sup>22</sup>. Cells from a single colony were first acclimated to minimal media in a  
332 cultivation in 5mL of M9 media for a day at 37°C and 220 rpm. After that, 5µL of culture  
333 were diluted in 5mL of fresh media and let grown overnight (16h) under the same  
334 parameters in order to harvest cells. The next day, a 1:50 dilution of the culture was done  
335 in fresh media and cells were let grow until reaching mid-log phase (OD<sub>600</sub> between 0.6  
336 and 0.9 depending on the strain), when the acid assay would start by the dilution of 10µL  
337 of the culture in 990µL of acid M9 media (pH 1.9), without antibiotics, in a  
338 microcentrifuge tube that was incubated at 37°C e 220 rpm.

339

340 At the moment cells were incubated ( $T_0$ ), as well as hourly during the acid incubation,  
341 10µL of cells were retrieved for colony forming units (CFU) counting and viable cell  
342 estimation, as previously described<sup>17</sup>. The acid shock was stopped by serial dilutions in  
343 neutral phosphate-buffered saline (PBS) buffer (pH 7.2) and three 25µL droplets  
344 (technical replicates) for each dilution at every timepoint were placed onto M9+agar  
345 plates and let grow overnight for colony formation. Survival percentage of cells was  
346 calculated by the ratio between CFU ml<sup>-1</sup> at a given point and the  $t_0$ . Experiments were  
347 performed with three biological replicates.

348

349 *Growth rates measurement and RBS calibration*

350 Cells' growth was measured at 600nm in the 96-well plate reader Victor X3  
351 (PerkinElmer, Inc.). In order to do so, cells from a single colony were harvested as



352 described for the acid resistance assay, but the overnight grown culture was instead  
353 aliquoted to a 1.0 OD as read by the Biophotometer D30 tabletop spectrophotometer  
354 (Eppendorf, Inc.). These aliquots were diluted to 1:10 ratio with either neutral or acidified  
355 M9 media and antibiotic in the 96-well plate for a final volume of 200 $\mu$ L. The plate was  
356 incubated at 37°C for up to eight hours, and punctual measurements of OD600 were  
357 automatically performed every 30 minutes. Every experiment was performed with three  
358 biological replicates, and three technical replicates were made for each.

359

360 RBS calibration experiments were carried in neutral media as described above, however,  
361 for these curves, both optical density at 600 nm (OD) and fluorescence (excitation 488  
362 nm and emission 535 nm) were measured, allowing the determination of fluorescence as  
363 a function of cell growth over time and IPTG (100 $\mu$ M) was added to the media in order  
364 to enhance fluorescence signal.

365

### 366 *Fitness cost calculation*

367 After growth curves were obtained, growth rates ( $\mu$ ) determination was done by  
368 estimating the slope of the curves during the linear exponential growth phase<sup>42</sup>, and the  
369 cost of different constructions over the host cells was calculated by the methodology  
370 described by Bienick and collaborators<sup>43</sup>. Fitness was calculated as the ratio between the  
371 reference growth rate ( $\mu_{ref}$ ), corresponding to the control expressing an empty plasmid,  
372 and the growth of each clone. This value was adjusted so that a theoretical quotient of 1  
373 meant 0% of fitness cost, as shown in **Equation 1**

374

375 Equation 1 
$$Fitness\ cost = 1 - \frac{\mu_{clone}}{\mu_{ref}}$$

376

377 *Data analysis and visualization*

378 Victor X3 data analysis and growth curve elaboration, as well as survival percentages  
379 estimations from the acid resistance assay, were made by *ad hoc* scripts using R  
380 programming language (version 3.5.2) and the ggplot2 package.

381

382 **Author contribution**

383 MEG and RSR conceived and designed the study. GMVS performed the experiments.  
384 GMVS wrote the manuscript. MEG and RSR revised the final version of the manuscript.  
385 All authors read and approved the final version.

386

387 **Supporting information**

388 **Figure S1.** Strength characterization of the synthetic RBS used in this study, as measured  
389 by GFP<sub>Iva</sub> fluorescence. **Figure S2.** Growth comparison between clones harboring  
390 pARC211 and pSEVA232 empty vector. **Figure S3.** Relationship analysis between acid  
391 resistance after 1h and metabolic fitness of the different clones harboring plasmids with  
392 combinations of the three RBS. **Table S1.** Survival percentages obtained at time points 1h and 2h  
393 of the acidic challenge. **Table S2.** Growth rate and fitness cost of strains grown in minimal  
394 medium. **Table S3.** Oligonucleotides used for assembly of synthetic circuits.

395

396 **Acknowledgements**

397 The authors wish to thank Thalita Ruil Prado for the invaluable support provided to the  
398 realization of our experiments, Caroline Moncaio Moda for assisting the measurements  
399 of RBS activity, and to all our lab colleagues for their insightful comments and  
400 suggestions throughout the course of this study. This work was supported by the Young  
401 Research Awards by the São Paulo State Foundation (FAPESP, award numbers  
402 2015/04309-1 and 2012/21922-8) and was also financed in part by the Coordenação de

403 Aperfeiçoamento de Pessoal de Nível Superior - Brasil (CAPES) - Finance Code 001.

404 GMVS is recipient of a M.Sc. fellowship from FAPESP (award number 2018/07261-8).

405

406

## 407 **References**

408 (1) Burk, M. J.; Van Dien, S. Biotechnology for Chemical Production: Challenges and

409 Opportunities. *Trends Biotechnol.* **2016**, *34* (3), 187–190.

410 <https://doi.org/10.1016/j.tibtech.2015.10.007>.

411 (2) Rinke, C.; Schwientek, P.; Sczyrba, A.; Ivanova, N. N.; Anderson, I. J.; Cheng, J.

412 F.; Darling, A.; Malfatti, S.; Swan, B. K.; Gies, E. A.; et al. Insights into the

413 Phylogeny and Coding Potential of Microbial Dark Matter. *Nature* **2013**, *499*

414 (7459), 431–437. <https://doi.org/10.1038/nature12352>.

415 (3) Schmidt-Dannert, C. The Future of Biologically Inspired Next-Generation

416 Factories for Chemicals. *Microb. Biotechnol.* **2017**, *10* (5), 1164–1166.

417 <https://doi.org/10.1111/1751-7915.12796>.

418 (4) Nickel, P. I.; de Lorenzo, V. *Pseudomonas Putida* as a Functional Chassis for

419 Industrial Biocatalysis: From Native Biochemistry to Trans-Metabolism. *Metab.*

420 *Eng.* **2018**, *50* (April), 142–155. <https://doi.org/10.1016/j.ymben.2018.05.005>.

421 (5) Chen, Y.; Nielsen, J. Biobased Organic Acids Production by Metabolically

422 Engineered Microorganisms. *Curr. Opin. Biotechnol.* **2016**, *37*, 165–172.

423 <https://doi.org/10.1016/j.copbio.2015.11.004>.

424 (6) Zhou, Y. J.; Kerkhoven, E. J.; Nielsen, J. Barriers and Opportunities in Bio-Based

425 Production of Hydrocarbons. *Nat. Energy* **2018**, *3* (11), 925–935.

426 <https://doi.org/10.1038/s41560-018-0197-x>.

427 (7) Alves, L. D. F.; Westmann, C. A.; Lovate, G. L.; De Siqueira, G. M. V.; Borelli,

- 428 T. C.; Guazzaroni, M. E. Metagenomic Approaches for Understanding New  
429 Concepts in Microbial Science. *Int. J. Genomics* **2018**, *2018*.  
430 <https://doi.org/10.1155/2018/2312987>.
- 431 (8) Littlechild, J. A. Enzymes from Extreme Environments and Their Industrial  
432 Applications. *Front. Bioeng. Biotechnol.* **2015**, *3* (OCT), 1–9.  
433 <https://doi.org/10.3389/fbioe.2015.00161>.
- 434 (9) Dhakal, D.; Pokhrel, A. R.; Shrestha, B.; Sohng, J. K. Marine Rare Actinobacteria:  
435 Isolation, Characterization, and Strategies for Harnessing Bioactive Compounds.  
436 *Front. Microbiol.* **2017**, *8* (JUN). <https://doi.org/10.3389/fmicb.2017.01106>.
- 437 (10) Amarelle, V.; Sanches-Medeiros, A.; Silva-Rocha, R.; Guazzaroni, M. E.  
438 Expanding the Toolbox of Broad Host-Range Transcriptional Terminators for  
439 Proteobacteria through Metagenomics. *ACS Synth. Biol.* **2019**, *8* (4), 647–654.  
440 <https://doi.org/10.1021/acssynbio.8b00507>.
- 441 (11) Feng, G.; Xie, T.; Wang, X.; Bai, J.; Tang, L.; Zhao, H.; Wei, W.; Wang, M.; Zhao,  
442 Y. Metagenomic Analysis of Microbial Community and Function Involved in Cd-  
443 Contaminated Soil. *BMC Microbiol.* **2018**, *18* (1), 1–13.  
444 <https://doi.org/10.1186/s12866-018-1152-5>.
- 445 (12) Bao, Y. J.; Xu, Z.; Li, Y.; Yao, Z.; Sun, J.; Song, H. High-Throughput  
446 Metagenomic Analysis of Petroleum-Contaminated Soil Microbiome Reveals the  
447 Versatility in Xenobiotic Aromatics Metabolism. *J. Environ. Sci. (China)* **2017**,  
448 *56*, 25–35. <https://doi.org/10.1016/j.jes.2016.08.022>.
- 449 (13) Quatrini, R.; Johnson, D. B. Microbiomes in Extremely Acidic Environments:  
450 Functionalities and Interactions That Allow Survival and Growth of Prokaryotes  
451 at Low PH. *Curr. Opin. Microbiol.* **2018**, *43*, 139–147.  
452 <https://doi.org/10.1016/j.mib.2018.01.011>.

- 453 (14) Liao, Z.; Zhang, Y.; Luo, S.; Suo, Y.; Zhang, S.; Wang, J. Improving Cellular  
454 Robustness and Butanol Titrers of *Clostridium Acetobutylicum* ATCC824 by  
455 Introducing Heat Shock Proteins from an Extremophilic Bacterium. *J. Biotechnol.*  
456 **2017**, *252* (April), 1–10. <https://doi.org/10.1016/j.jbiotec.2017.04.031>.
- 457 (15) Dunlop, M. J.; Dossani, Z. Y.; Szmidt, H. L.; Chu, H. C.; Lee, T. S.; Keasling, J.  
458 D.; Hadi, M. Z.; Mukhopadhyay, A. Engineering Microbial Biofuel Tolerance and  
459 Export Using Efflux Pumps. *Mol. Syst. Biol.* **2011**, *7* (487), 1–7.  
460 <https://doi.org/10.1038/msb.2011.21>.
- 461 (16) Park, S. H.; Singh, H.; Appukuttan, D.; Jeong, S.; Choi, Y. J.; Jung, J. H.; Narumi,  
462 I.; Lim, S. PprM, a Cold Shock Domain-Containing Protein from *Deinococcus*  
463 *Radiodurans*, Confers Oxidative Stress Tolerance to *Escherichia Coli*. *Front.*  
464 *Microbiol.* **2017**, *7* (JAN), 1–11. <https://doi.org/10.3389/fmicb.2016.02124>.
- 465 (17) Guazzaroni, M. E.; Morgante, V.; Mirete, S.; González-Pastor, J. E. Novel Acid  
466 Resistance Genes from the Metagenome of the Tinto River, an Extremely Acidic  
467 Environment. *Environ. Microbiol.* **2013**, *15* (4), 1088–1102.  
468 <https://doi.org/10.1111/1462-2920.12021>.
- 469 (18) Oberto, J.; Nabti, S.; Jooste, V.; Mignot, H.; Rouviere-Yaniv, J. The HU Regulon  
470 Is Composed of Genes Responding to Anaerobiosis, Acid Stress, High Osmolarity  
471 and SOS Induction. *PLoS One* **2009**, *4* (2).  
472 <https://doi.org/10.1371/journal.pone.0004367>.
- 473 (19) Kress, W.; Maglica, Ž.; Weber-Ban, E. Clp Chaperone-Proteases: Structure and  
474 Function. *Res. Microbiol.* **2009**, *160* (9), 618–628.  
475 <https://doi.org/10.1016/j.resmic.2009.08.006>.
- 476 (20) Silva-Rocha, R.; Martínez-García, E.; Calles, B.; Chavarría, M.; Arce-Rodríguez,  
477 A.; De Las Heras, A.; Páez-Espino, A. D.; Durante-Rodríguez, G.; Kim, J.; Nikel,

- 478 P. I.; et al. The Standard European Vector Architecture (SEVA): A Coherent  
479 Platform for the Analysis and Deployment of Complex Prokaryotic Phenotypes.  
480 *Nucleic Acids Res.* **2013**, *41* (D1), 666–675. <https://doi.org/10.1093/nar/gks1119>.
- 481 (21) Andersen, J. B.; Sternberg, C.; Poulsen, L. K.; Bjørn, S. P.; Givskov, M.; Molin,  
482 S. New Unstable Variants of Green Fluorescent Protein for Studies of Transient  
483 Gene Expression in Bacteria. *Appl. Environ. Microbiol.* **1998**, *64* (6), 2240–2246.
- 484 (22) Lund, P.; Tramonti, A.; De Biase, D. Coping with Low PH: Molecular Strategies  
485 in Neutralophilic Bacteria. *FEMS Microbiol. Rev.* **2014**, *38* (6), 1091–1125.  
486 <https://doi.org/10.1111/1574-6976.12076>.
- 487 (23) Cambray, G.; Guimaraes, J. C.; Arkin, A. P. Evaluation of 244,000 Synthetic  
488 Sequences Reveals Design Principles to Optimize Translation in Escherichia Coli.  
489 *Nat. Biotechnol.* **2018**, *36* (10), 1005. <https://doi.org/10.1038/nbt.4238>.
- 490 (24) Farasat, I.; Kushwaha, M.; Collens, J.; Easterbrook, M.; Guido, M.; Salis, H. M.  
491 Efficient Search, Mapping, and Optimization of Multi-protein Genetic Systems in  
492 Diverse Bacteria. *Mol. Syst. Biol.* **2014**, *10* (6), 731.  
493 <https://doi.org/10.15252/msb.20134955>.
- 494 (25) Levin-Karp, A.; Barenholz, U.; Bareia, T.; Dayagi, M.; Zelcbuch, L.; Antonovsky,  
495 N.; Noor, E.; Milo, R. Quantifying Translational Coupling in E. Coli Synthetic  
496 Operons Using RBS Modulation and Fluorescent Reporters. *ACS Synth. Biol.*  
497 **2013**, *2* (6), 327–336. <https://doi.org/10.1021/sb400002n>.
- 498 (26) Borkowski, O.; Ceroni, F.; Stan, G. B.; Ellis, T. Overloaded and Stressed: Whole-  
499 Cell Considerations for Bacterial Synthetic Biology. *Curr. Opin. Microbiol.* **2016**,  
500 *33*, 123–130. <https://doi.org/10.1016/j.mib.2016.07.009>.
- 501 (27) Grove, A. Functional Evolution of Bacterial Histone-Like HU Proteins. *Curr.*  
502 *Issues Mol. Biol.* **2016**, *13*, 1–12.

- 503 (28) Nguyen, H. H.; De La Tour, C. B.; Toueille, M.; Vannier, F.; Sommer, S.; Servant,  
504 P. The Essential Histone-like Protein HU Plays a Major Role in *Deinococcus*  
505 *Radiodurans* Nucleoid Compaction. *Mol. Microbiol.* **2009**, *73* (2), 240–252.  
506 <https://doi.org/10.1111/j.1365-2958.2009.06766.x>.
- 507 (29) Balandina, A.; Claret, L.; Hengge-Aronis, R.; Rouviere-Yaniv, J. The *Escherichia*  
508 *Coli* Histone-like Protein HU Regulates RpoS Translation. *Mol. Microbiol.* **2001**,  
509 *39* (4), 1069–1079. <https://doi.org/10.1046/j.1365-2958.2001.02305.x>.
- 510 (30) Takhaveev, V.; Heinemann, M. Metabolic Heterogeneity in Clonal Microbial  
511 Populations. *Curr. Opin. Microbiol.* **2018**, *45*, 30–38.  
512 <https://doi.org/10.1016/j.mib.2018.02.004>.
- 513 (31) Rugbjerg, P.; Myling-Petersen, N.; Porse, A.; Sarup-Lytzen, K.; Sommer, M. O.  
514 A. Diverse Genetic Error Modes Constrain Large-Scale Bio-Based Production.  
515 *Nat. Commun.* **2018**, *9* (1). <https://doi.org/10.1038/s41467-018-03232-w>.
- 516 (32) Zelcbuch, L.; Antonovsky, N.; Bar-Even, A.; Levin-Karp, A.; Barenholz, U.;  
517 Dayagi, M.; Liebermeister, W.; Flamholz, A.; Noor, E.; Amram, S.; et al. Spanning  
518 High-Dimensional Expression Space Using Ribosome-Binding Site  
519 Combinatorics. *Nucleic Acids Res.* **2013**, *41* (9).  
520 <https://doi.org/10.1093/nar/gkt151>.
- 521 (33) Smanski, M. J.; Bhatia, S.; Zhao, D.; Park, Y. J.; Woodruff, L. B. A.; Giannoukos,  
522 G.; Ciulla, D.; Busby, M.; Calderon, J.; Nicol, R.; et al. Functional Optimization  
523 of Gene Clusters by Combinatorial Design and Assembly. *Nat. Biotechnol.* **2014**,  
524 *32* (12), 1241–1249. <https://doi.org/10.1038/nbt.3063>.
- 525 (34) Jeschek, M.; Gerngross, D.; Panke, S. Rationally Reduced Libraries for  
526 Combinatorial Pathway Optimization Minimizing Experimental Effort. *Nat.*  
527 *Commun.* **2016**, *7*, 1–10. <https://doi.org/10.1038/ncomms11163>.

- 528 (35) Pham, H. L.; Wong, A.; Chua, N.; Teo, W. S.; Yew, W. S.; Chang, M. W.  
529 Engineering a Riboswitch-Based Genetic Platform for the Self-Directed Evolution  
530 of Acid-Tolerant Phenotypes. *Nat. Commun.* **2017**, *8* (1).  
531 <https://doi.org/10.1038/s41467-017-00511-w>.
- 532 (36) Jia, H.; Sun, X.; Sun, H.; Li, C.; Wang, Y.; Feng, X.; Li, C. Intelligent Microbial  
533 Heat-Regulating Engine (IMHeRE) for Improved Thermo-Robustness and  
534 Efficiency of Bioconversion. *ACS Synth. Biol.* **2016**, *5* (4), 312–320.  
535 <https://doi.org/10.1021/acssynbio.5b00158>.
- 536 (37) Sun, H.; Jia, H.; Li, J.; Feng, X.; Liu, Y.; Zhou, X.; Li, C. Rational Synthetic  
537 Combination Genetic Devices Boosting High Temperature Ethanol Fermentation.  
538 *Synth. Syst. Biotechnol.* **2017**, *2* (2), 121–129.  
539 <https://doi.org/10.1016/j.synbio.2017.04.003>.
- 540 (38) Nicolaou, S. A.; Gaida, S. M.; Papoutsakis, E. T. Exploring the Combinatorial  
541 Genomic Space in Escherichia Coli for Ethanol Tolerance. *Biotechnol. J.* **2012**, *7*  
542 (11), 1337–1345. <https://doi.org/10.1002/biot.201200227>.
- 543 (39) Siu, Y.; Fenno, J.; Lindle, J. M.; Dunlop, M. J. Design and Selection of a Synthetic  
544 Feedback Loop for Optimizing Biofuel Tolerance. *ACS Synth. Biol.* **2018**, *7* (1),  
545 16–23. <https://doi.org/10.1021/acssynbio.7b00260>.
- 546 (40) Dahl, R. H.; Zhang, F.; Alonso-Gutierrez, J.; Baidoo, E.; Batth, T. S.; Redding-  
547 Johanson, A. M.; Petzold, C. J.; Mukhopadhyay, A.; Lee, T. S.; Adams, P. D.; et  
548 al. Engineering Dynamic Pathway Regulation Using Stress-Response Promoters.  
549 *Nat. Biotechnol.* **2013**, *31* (11), 1039–1046. <https://doi.org/10.1038/nbt.2689>.
- 550 (41) Shubeita, H. E.; Sambrook, J. F.; McCormick, A. M. Molecular Cloning and  
551 Analysis of Functional cDNA and Genomic Clones Encoding Bovine Cellular  
552 Retinoic Acid-Binding Protein. *Proc. Natl. Acad. Sci. U. S. A.* **1987**, *84* (16), 5645–



- 553 5649. <https://doi.org/10.1073/pnas.84.16.5645>.
- 554 (42) Buchanan, R. L.; Whiting, R. C.; Damert, W. C. When Is Simple Good Enough: A  
555 Comparison of the Gompertz, Baranyi, and Three-Phase Linear Models for Fitting  
556 Bacterial Growth Curves. *Food Microbiol.* **1997**, *14* (4), 313–326.  
557 <https://doi.org/10.1006/fmic.1997.0125>.
- 558 (43) Bienick, M. S.; Young, K. W.; Klesmith, J. R.; Detwiler, E. E.; Tomek, K. J.;  
559 Whitehead, T. A. The Interrelationship between Promoter Strength, Gene  
560 Expression, and Growth Rate. *PLoS One* **2014**, *9* (10).  
561 <https://doi.org/10.1371/journal.pone.0109105>.

562

## 563 Tables

564 **Table 1.** Summary of the biological parts that constitute the genetic circuits built in this  
565 work.

566

| Part                  | Name             | Size    |
|-----------------------|------------------|---------|
| Backbone              | pSEVA232         | 3572 bp |
| Promoter              | P <sub>lac</sub> | 96 bp   |
| Ribosome Binding Site | BBa_B0031 (RBS1) | 15 bp   |
|                       | BBa_B0030 (RBS2) | 14 bp   |
|                       | BBa_B0034 (RBS3) | 12 bp   |
| Resistance genes      | <i>rbp</i>       | 345 bp  |
|                       | <i>clpP</i>      | 597 bp  |
|                       | <i>hu</i>        | 282 bp  |

574

575

576
